# Supplementary material for: Dissection of the potential pharmacological mechanism ofRhizoma coptidiswater extract against inflammation in diabetes mellitusviachemical profiling, network pharmacology and experimental validation
Source: Royal Society of Chemistry journal article supplement (doi:10.1039/d1nj02812j), 2021-01-01
Supplement: d1nj02812j1.pdf [file d1nj02812j1.pdf]

Supplementary materials

**Table S1** Chemical constituents isolated from *Rhizoma Coptidis*

| Types            | Chemical name                                             | Formula                                            | Molecular weight | Reference |
|------------------|-----------------------------------------------------------|----------------------------------------------------|------------------|-----------|
| <b>Alkaloids</b> |                                                           |                                                    |                  |           |
| 1                | berberine                                                 | C <sub>20</sub> H <sub>18</sub> NO <sub>4</sub>    | 336.1236         | 1         |
| 2                | berberrubine                                              | C <sub>19</sub> H <sub>16</sub> NO <sub>4</sub>    | 322.1079         | 1         |
| 3                | coptisine                                                 | C <sub>19</sub> H <sub>14</sub> NO <sub>4</sub>    | 320.0923         | 1         |
| 4                | palmatine                                                 | C <sub>21</sub> H <sub>22</sub> NO <sub>4</sub>    | 352.1549         | 1         |
| 5                | epiberberine                                              | C <sub>20</sub> H <sub>18</sub> NO <sub>4</sub>    | 336.1236         | 1         |
| 6                | columbamine                                               | C <sub>20</sub> H <sub>20</sub> NO <sub>4</sub>    | 338.1392         | 1         |
| 7                | tetradehydroscoulerine                                    | C <sub>19</sub> H <sub>16</sub> NO <sub>4</sub>    | 322.1079         | 1         |
| 8                | jatrorrhizine                                             | C <sub>20</sub> H <sub>20</sub> NO <sub>4</sub>    | 338.1392         | 1         |
| 9                | groenlandicine                                            | C <sub>19</sub> H <sub>16</sub> NO <sub>4</sub>    | 322.1079         | 1         |
| 10               | berberastine                                              | C <sub>20</sub> H <sub>18</sub> NO <sub>5</sub>    | 352.1185         | 1         |
| 11               | worenine                                                  | C <sub>20</sub> H <sub>16</sub> NO <sub>4</sub>    | 334.1079         | 1         |
| 12               | 8-oxyberberine                                            | C <sub>20</sub> H <sub>17</sub> NO <sub>5</sub>    | 351.1107         | 1         |
| 13               | 8-oxycoptisine                                            | C <sub>19</sub> H <sub>13</sub> NO <sub>5</sub>    | 335.0794         | 1         |
| 14               | 3-hydroxy-2-methoxy-9,10-methylenedioxy-8-oxyptoberberine | C <sub>19</sub> H <sub>15</sub> NO <sub>5</sub>    | 337.0950         | 1         |
| 15               | 8-oxypiberberine                                          | C <sub>20</sub> H <sub>17</sub> NO <sub>5</sub>    | 351.1107         | 1         |
| 16               | 8-oxyberberrubine                                         | C <sub>19</sub> H <sub>15</sub> NO <sub>5</sub>    | 337.0950         | 1         |
| 17               | (-)-5-hydroxyl-8-oxyberberine                             | C <sub>20</sub> H <sub>17</sub> NO <sub>6</sub>    | 367.1056         | 1         |
| 18               | (+)-5-hydroxyl-8-oxyberberine                             | C <sub>20</sub> H <sub>17</sub> NO <sub>6</sub>    | 367.1056         | 1         |
| 19               | tetrahydroberberine                                       | C <sub>20</sub> H <sub>21</sub> NO <sub>4</sub>    | 339.1471         | 1         |
| 20               | 8,13-dioxocoptisine hydroxide                             | C <sub>19</sub> H <sub>12</sub> NO <sub>6</sub> HO | 367.0692         | 1         |
| 21               | 1,3-dioxolo[4,5-g] isoquinolin-5(6H)-one                  | C <sub>10</sub> H <sub>7</sub> NO <sub>3</sub>     | 189.0426         | 1         |
| 22               | noroxyhydrastinine                                        | C <sub>10</sub> H <sub>9</sub> NO <sub>3</sub>     | 191.0582         | 1         |

## Supplementary materials

|                |                                                                                        |                      |          |   |
|----------------|----------------------------------------------------------------------------------------|----------------------|----------|---|
| 23             | corydaldine                                                                            | $C_{11}H_{13}NO_3$   | 207.0895 | 1 |
| 24             | thalifoline                                                                            | $C_{11}H_{13}NO_3$   | 207.0895 | 1 |
| 25             | 6-([1,3]dioxolo[4,5-g]isoquinoline-5-carbonyl)-2,3-dimethoxy benzoic acid methyl ester | $C_{21}H_{17}NO_7$   | 395.1005 | 1 |
| 26             | berbithine                                                                             | $C_{19}H_{17}NO_5$   | 339.1107 | 1 |
| 27             | coptisonine                                                                            | $C_{19}H_{14}NO_5HO$ | 353.0899 | 1 |
| 28             | tetrandrine                                                                            | $C_{38}H_{42}N_2O_6$ | 622.3043 | 1 |
| 29             | obamegine                                                                              | $C_{36}H_{38}N_2O_6$ | 594.2730 | 1 |
| 30             | magnoflorine                                                                           | $C_{20}H_{24}NO_4$   | 342.1705 | 1 |
| 31             | sanguinarine                                                                           | $C_{20}H_{14}NO_4$   | 332.0923 | 1 |
| 32             | norsanguinarine                                                                        | $C_{19}H_{11}NO_4$   | 317.0688 | 1 |
| 33             | oxysanguinarine                                                                        | $C_{20}H_{13}NO_5$   | 347.0794 | 1 |
| 34             | 6-acetyl-5,6-dihydrosanguinarine                                                       | $C_{23}H_{19}NO_5$   | 389.1263 | 1 |
| 35             | chilenine                                                                              | $C_{20}H_{17}NO_7$   | 383.1005 | 1 |
| 36             | ( <i>Z</i> )- <i>N</i> -Feruloyltyramine                                               | $C_{18}H_{19}NO_4$   | 313.1314 | 1 |
| 37             | ( <i>E</i> )- <i>N</i> -Feruloyltyramine                                               | $C_{18}H_{19}NO_4$   | 313.1314 | 1 |
| 38             | 3-hydroxy-1-(4-hydroxyphenethyl) pyrrolidine-2,5-dione pyrrolidine-2,5-dione           | $C_{12}H_{13}NO_4$   | 235.0845 | 1 |
| 39             | 4'-[formyl-5-(hydroxymethyl)-1H-pyrrol-1-yl] butanoate butanoate                       | $C_{11}H_{15}NO_4$   | 225.1001 | 1 |
| 40             | 8,9-dihydroxy-1,5,6,10- $\beta$ -tetrahydro-2H-pyrrolo[2,1-a]-isoquinolin-5-one        | $C_{12}H_{13}NO_3$   | 219.0895 | 1 |
| 41             | ethyl-2-pyrrolidinone-5(S)-carboxylate                                                 | $C_7H_{11}NO_3$      | 157.0739 | 1 |
| 42             | methyl-5-hydroxy-2-pyridinecarboxylate                                                 | $C_7H_7NO_3$         | 153.0426 | 1 |
| 43             | 1H-indole-3-carboxaldehyde                                                             | $C_9H_7NO$           | 145.0528 | 1 |
| 44             | choline                                                                                | $C_5H_{14}NO$        | 104.1075 | 1 |
| <b>Lignans</b> |                                                                                        |                      |          | 1 |
| 45             | woorenogenin                                                                           | $C_{22}H_{26}O_7$    | 402.1679 | 1 |
| 46             | woorenoside I                                                                          | $C_{28}H_{36}O_{12}$ | 564.2207 | 1 |
| 47             | longifolroside A                                                                       | $C_{27}H_{34}O_{11}$ | 534.2101 | 1 |

## Supplementary materials

|    |                                                                           |                      |          |   |
|----|---------------------------------------------------------------------------|----------------------|----------|---|
| 48 | woorenoside II                                                            | $C_{30}H_{38}O_{13}$ | 606.2312 | 1 |
| 49 | woorenoside V                                                             | $C_{31}H_{38}O_{13}$ | 618.2312 | 1 |
| 50 | woorenoside III                                                           | $C_{33}H_{42}O_{14}$ | 662.2575 | 1 |
| 51 | woorenoside IV                                                            | $C_{35}H_{44}O_{15}$ | 704.2680 | 1 |
| 52 | (+)-pinoresinol                                                           | $C_{20}H_{22}O_6$    | 358.1416 | 1 |
| 53 | (+)-medioresinol                                                          | $C_{21}H_{24}O_7$    | 388.1522 | 1 |
| 54 | (+)-pinoresinol-4'- <i>O</i> - $\beta$ -glucopyranoside                   | $C_{26}H_{32}O_{11}$ | 520.1945 | 1 |
| 55 | (+)-pinoresinol-4,4'- <i>O</i> - $\beta$ -D-diglucopyranoside             | $C_{32}H_{42}O_{16}$ | 682.2473 | 1 |
| 56 | (+)-Syringaresinol-4'- <i>O</i> - $\beta$ -glucopyranoside                | $C_{28}H_{36}O_{13}$ | 580.2156 | 1 |
| 57 | (+)-lariciresinol                                                         | $C_{20}H_{24}O_6$    | 360.1573 | 1 |
| 58 | ( $\pm$ )-5,5'-dimethoxylariciresinol                                     | $C_{22}H_{28}O_8$    | 420.1784 | 1 |
| 59 | (+)-5'-methoxylariciresinol                                               | $C_{21}H_{26}O_7$    | 390.1679 | 1 |
| 60 | (+)-lariciresinol glucoside                                               | $C_{26}H_{34}O_{11}$ | 522.2101 | 1 |
| 61 | 7S,8R,8'R-(+)-lariciresinol-4,4'- <i>O</i> - $\beta$ -D-diglucopyranoside | $C_{32}H_{44}O_{16}$ | 684.2629 | 1 |
| 62 | lanicepside A                                                             | $C_{26}H_{34}O_{12}$ | 538.2050 | 1 |
| 63 | 9-acetyl lanicepside B                                                    | $C_{28}H_{36}O_{13}$ | 580.2156 | 1 |
| 64 | (+)-Isolariciresinol                                                      | $C_{20}H_{24}O_6$    | 360.1573 | 1 |
| 65 | isolarisiresinol-9- <i>O</i> - $\beta$ -D-glucopyranoside                 | $C_{26}H_{34}O_{11}$ | 522.2101 | 1 |
| 66 | woorenoside XI                                                            | $C_{26}H_{34}O_{11}$ | 522.2101 | 1 |
| 67 | cleomiscosin A                                                            | $C_{20}H_{18}O_8$    | 386.1002 | 1 |
| 68 | aquillochin                                                               | $C_{21}H_{20}O_9$    | 416.1107 | 1 |
| 69 | 2,3-bis[(4-hydroxy-3,5-dimethoxyphenyl)-methyl]-1,4-butanediol            | $C_{22}H_{30}O_8$    | 422.1941 | 1 |
| 70 | secoisolariciresinol                                                      | $C_{20}H_{26}O_6$    | 362.1729 | 1 |
| 71 | erythro-guaiacylglycerol-8- <i>O</i> -4'-(coniferylalcohol) ether         | $C_{20}H_{24}O_7$    | 376.1522 | 1 |
| 72 | threo-guaiacylglycerol-8- <i>O</i> -4'-(coniferylalcohol) ether           | $C_{20}H_{24}O_7$    | 376.1522 | 1 |
| 73 | woorenoside X                                                             | $C_{29}H_{40}O_{14}$ | 612.2418 | 1 |

## Supplementary materials

---

|                                |                                                                                                |                                                 |          |   |
|--------------------------------|------------------------------------------------------------------------------------------------|-------------------------------------------------|----------|---|
| 74                             | dihydrodehydrodiconiferyl alcohol                                                              | C <sub>20</sub> H <sub>24</sub> O <sub>6</sub>  | 360.1573 | 1 |
| 75                             | woorenol                                                                                       | C <sub>32</sub> H <sub>40</sub> O <sub>13</sub> | 632.2469 | 1 |
| <b>Simple phenylpropanoids</b> |                                                                                                |                                                 |          |   |
| 76                             | <i>Z</i> -octadecyl cafeate                                                                    | C <sub>27</sub> H <sub>44</sub> O <sub>7</sub>  | 480.3087 | 1 |
| 77                             | <i>E</i> -3-methoxycinnamic acid                                                               | C <sub>10</sub> H <sub>10</sub> O <sub>3</sub>  | 178.0630 | 1 |
| 78                             | ferulic acid                                                                                   | C <sub>10</sub> H <sub>10</sub> O <sub>4</sub>  | 194.0579 | 1 |
| 79                             | ethyl ferulate                                                                                 | C <sub>12</sub> H <sub>14</sub> O <sub>4</sub>  | 222.0892 | 1 |
| 80                             | <i>n</i> -butyl ferulate                                                                       | C <sub>14</sub> H <sub>18</sub> O <sub>4</sub>  | 250.1205 | 1 |
| 81                             | <i>p</i> -hydroxyphenethyl <i>E</i> -ferulate                                                  | C <sub>18</sub> H <sub>18</sub> O <sub>5</sub>  | 314.1154 | 1 |
| 82                             | <i>E</i> -3,4-dimethoxycinnamic acid                                                           | C <sub>11</sub> H <sub>12</sub> O <sub>4</sub>  | 208.0736 | 1 |
| 83                             | 4- <i>O</i> -feruloylquinic acid                                                               | C <sub>17</sub> H <sub>20</sub> O <sub>9</sub>  | 368.1107 | 1 |
| 84                             | methyl 4- <i>O</i> -feruloylquicinate                                                          | C <sub>18</sub> H <sub>22</sub> O <sub>9</sub>  | 382.1264 | 1 |
| 85                             | ethyl 4- <i>O</i> -feruloylquicinate                                                           | C <sub>19</sub> H <sub>24</sub> O <sub>9</sub>  | 396.1420 | 1 |
| 86                             | 4- <i>O</i> -feruloylquinic acid butyl ester                                                   | C <sub>21</sub> H <sub>28</sub> O <sub>9</sub>  | 424.1733 | 1 |
| 87                             | 5- <i>O</i> -feruloylquinic acid                                                               | C <sub>17</sub> H <sub>20</sub> O <sub>9</sub>  | 368.1107 | 1 |
| 88                             | methyl 5- <i>O</i> -feruloylquicinate                                                          | C <sub>18</sub> H <sub>22</sub> O <sub>9</sub>  | 382.1264 | 1 |
| 89                             | ethyl 5- <i>O</i> -feruloylquicinate                                                           | C <sub>19</sub> H <sub>24</sub> O <sub>9</sub>  | 396.1420 | 1 |
| 90                             | 5- <i>O</i> -feruloylquinic acid butyl ester                                                   | C <sub>21</sub> H <sub>28</sub> O <sub>9</sub>  | 424.1733 | 1 |
| 91                             | chlorogenic acid                                                                               | C <sub>16</sub> H <sub>18</sub> O <sub>9</sub>  | 354.0951 | 1 |
| 92                             | methyl 3- <i>O</i> -feruloylquicinate                                                          | C <sub>18</sub> H <sub>22</sub> O <sub>9</sub>  | 382.1264 | 1 |
| 93                             | <i>N</i> -butyl 3- <i>O</i> -feruloylquicinate                                                 | C <sub>21</sub> H <sub>28</sub> O <sub>9</sub>  | 424.1733 | 1 |
| 94                             | 3-(4'-hydroxyphenyl)-(2 <i>R</i> )-lactic acid                                                 | C <sub>9</sub> H <sub>10</sub> O <sub>4</sub>   | 182.0579 | 1 |
| 95                             | 3-(3',4'-hydroxyphenyl)-(2 <i>R</i> )-lactic acid                                              | C <sub>9</sub> H <sub>10</sub> O <sub>5</sub>   | 198.0528 | 1 |
| 96                             | 3-(3',4'-dihydroxyphenyl)-(2 <i>R</i> )-lactic acid-4'- <i>O</i> -β- <i>D</i> -glucopyranoside | C <sub>15</sub> H <sub>20</sub> O <sub>10</sub> | 360.1056 | 1 |
| 97                             | methyl-3-(4'- <i>O</i> -β- <i>D</i> -glucopyranosyl-3',4'-dihydroxyphenyl)-lactate             | C <sub>16</sub> H <sub>22</sub> O <sub>10</sub> | 374.1213 | 1 |
| 98                             | methyl-3,4-dihydroxyphenyl lactate                                                             | C <sub>10</sub> H <sub>12</sub> O <sub>5</sub>  | 212.0685 | 1 |

## Supplementary materials

|                   |                                                          |                                                 |           |   |
|-------------------|----------------------------------------------------------|-------------------------------------------------|-----------|---|
| 99                | ethyl-3,4-dihydroxyphenyl lactate                        | C <sub>11</sub> H <sub>14</sub> O <sub>5</sub>  | 226.0841  | 1 |
| 100               | <i>n</i> -butyl-3,4-dihydroxyphenyl lactate              | C <sub>13</sub> H <sub>18</sub> O <sub>5</sub>  | 254.1154  | 1 |
| 101               | 3-(2,3,4-trihydroxyphenyl) propanoic acid                | C <sub>9</sub> H <sub>10</sub> O <sub>5</sub>   | 198.0528  | 1 |
| <b>Flavonoids</b> |                                                          |                                                 |           |   |
| 102               | 6,8-dimethyl-3,5,7-trihydroxyfavone                      | C <sub>17</sub> H <sub>14</sub> O <sub>5</sub>  | 298.0841  | 1 |
| 103               | rhamnetin                                                | C <sub>16</sub> H <sub>12</sub> O <sub>7</sub>  | 316.0583  | 1 |
| 104               | wogonin                                                  | C <sub>16</sub> H <sub>12</sub> O <sub>5</sub>  | 284.0685  | 1 |
| 105               | 7,4'-dihydroxy-5-methoxyfavanone                         | C <sub>16</sub> H <sub>14</sub> O <sub>5</sub>  | 286.0841  | 1 |
| 106               | 2',4,4'-trihydroxy-6'-methoxydihydrochalcone             | C <sub>16</sub> H <sub>16</sub> O <sub>5</sub>  | 288.0998  | 1 |
| 107               | coptiside I                                              | C <sub>46</sub> H <sub>58</sub> O <sub>27</sub> | 1042.3165 | 1 |
| 108               | coptiside II                                             | C <sub>21</sub> H <sub>20</sub> O <sub>12</sub> | 464.0955  | 1 |
| 109               | woorenoside XII                                          | C <sub>42</sub> H <sub>54</sub> O <sub>25</sub> | 958.2954  | 1 |
| <b>Others</b>     |                                                          |                                                 |           |   |
| 110               | limonin                                                  | C <sub>26</sub> H <sub>30</sub> O <sub>8</sub>  | 470.1941  | 1 |
| 111               | 3,4-dihydroxyphenylethyl alcohol                         | C <sub>8</sub> H <sub>10</sub> O <sub>3</sub>   | 154.0630  | 1 |
| 112               | 3',4'-dihydroxyphenethyl alcohol-1-O-β-D-glucopyranoside | C <sub>14</sub> H <sub>20</sub> O <sub>8</sub>  | 316.1158  | 1 |
| 113               | 3,5-dihydroxyphenethyl alcohol-3-O-β-D-glucopyranoside   | C <sub>14</sub> H <sub>20</sub> O <sub>8</sub>  | 316.1158  | 1 |
| 114               | protocatechuic aldehyde                                  | C <sub>7</sub> H <sub>6</sub> O <sub>3</sub>    | 138.0317  | 1 |
| 115               | gentisic acid-5-O-β-D-glucopyranoside                    | C <sub>13</sub> H <sub>16</sub> O <sub>9</sub>  | 316.0794  | 1 |
| 116               | apocynol                                                 | C <sub>9</sub> H <sub>12</sub> O <sub>3</sub>   | 168.0786  | 1 |
| 117               | 1,2-dihydroxy-benzene                                    | C <sub>6</sub> H <sub>6</sub> O <sub>2</sub>    | 110.0368  | 1 |
| 118               | protocatechuic acid                                      | C <sub>7</sub> H <sub>6</sub> O <sub>4</sub>    | 154.0266  | 1 |
| 119               | vanillic acid                                            | C <sub>8</sub> H <sub>8</sub> O <sub>4</sub>    | 168.0423  | 1 |
| 120               | vanillic acid-4-O-β-D-glucopyranoside                    | C <sub>14</sub> H <sub>18</sub> O <sub>9</sub>  | 330.0951  | 1 |
| 121               | protocatechuic acid methyl ester                         | C <sub>8</sub> H <sub>8</sub> O <sub>4</sub>    | 168.0423  | 1 |
| 122               | protocatechuic acid ethyl ester                          | C <sub>9</sub> H <sub>10</sub> O <sub>4</sub>   | 182.0579  | 1 |

---

Supplementary materials

---

|     |                     |                      |          |   |
|-----|---------------------|----------------------|----------|---|
| 123 | woorenoside VI      | $C_{11}H_{20}O_7$    | 264.1209 | 1 |
| 124 | woorenoside VII     | $C_{16}H_{26}O_9$    | 362.1577 | 1 |
| 125 | woorenoside VIII    | $C_{11}H_{20}O_7$    | 264.1209 | 1 |
| 126 | woorenoside IX      | $C_{16}H_{26}O_9$    | 362.1577 | 1 |
| 127 | cyclo-(Phe-Val)     | $C_{14}H_{18}N_2O_2$ | 246.1368 | 1 |
| 128 | cyclo-(Phe-Leu)     | $C_{15}H_{20}N_2O_2$ | 260.1525 | 1 |
| 129 | $\beta$ -sitosterol | $C_{29}H_{50}O$      | 414.3862 | 1 |

---

**Reference:**

1. J. Wang, L. Wang, G.-H. Lou, H.-R. Zeng, J. Hu, Q.-W. Huang, W. Peng and X.-B. Yang, *Pharmaceutical Biology*, 2019, **57**, 193-225.

**Table S2** The chemical constituents in Rhizoma Coptidis used for targets prediction

| No | Characterization                                                    | SMILE format of structures                                                                                                   |
|----|---------------------------------------------------------------------|------------------------------------------------------------------------------------------------------------------------------|
| 2  | quinic acid                                                         | <chem>O[C@@H]1[C@H](O)C[C@@](O)(C(O)=O)C[C@H]1O</chem>                                                                       |
| 4  | 3-(3',4'-dihydroxyphenyl)-(2R)-lactic acid-4'-O-β-D-glucopyranoside | <chem>OC(C(O)=O)CC1=CC(O)=C(O[C@H]2[C@H](O)[C@@H](O)[C@H](O)[C@@H](CO)O2)C=C1</chem>                                         |
| 5  | vanillic acid-4-O-β-D-glucopyranoside                               | <chem>O=C(O)C1=CC(OC)=C(O[C@H]2[C@H](O)[C@@H](O)[C@H](O)[C@@H](CO)O2)C=C1</chem>                                             |
| 6  | gentisic acid-5-O-β-D-glucopyranoside                               | <chem>OC1=CC=C(O[C@H]2[C@H](O)C(O)[C@H](O)[C@@H](CO)O2)C=C1C(O)=O</chem>                                                     |
| 7  | 5-feruloylquinic acid-4'-O-β-D-glucopyranoside                      | <chem>O[C@@H]1[C@H](OC/C=C/C2=CC(OC)=C(O[C@H]3[C@H](O)[C@@H](O)[C@H](O)[C@@H](CO)O3)C=C2)O)C[C@@](O)(C(O)=O)C[C@H]1O</chem>  |
| 8  | vanillic acid                                                       | <chem>O=C(O)C1=CC(OC)=C(O)C=C1</chem>                                                                                        |
| 9  | 3-(2,3,4-trihydroxyphenyl) propanoic acid                           | <chem>OC1=C(O)C(O)=CC(CCC(O)=O)=C1</chem>                                                                                    |
| 10 | 3',4'-dihydroxyphenethyl alcohol-1-O-β-D-glucopyranoside            | <chem>OC1=C(O)C=C(CCO[C@H]2[C@H](O)[C@@H](O)[C@H](O)[C@@H](CO)O2)C=C1</chem>                                                 |
| 12 | 3,5-dihydroxyphenethyl alcohol-3-O-β-D-glucopyranoside              | <chem>OCCC1=CC(O[C@H]2[C@H](O)[C@@H](O)[C@H](O)[C@@H](CO)O2)=CC(O)=C1</chem>                                                 |
| 13 | 3-feruloylquinic acid-4'-O-β-D-glucopyranoside                      | <chem>O[C@@H]1[C@H](O)C[C@@](O)(C(O)=O)C[C@H]1OC/C=C/C2=CC(OC)=C(O[C@@H]3[C@@H](O)[C@H](O)[C@@H](O)[C@H](CO)O3)C=C2)O</chem> |
| 14 | 3-(3',4'-hydroxyphenyl)-(2R)-lactic acid                            | <chem>OC(C(O)=O)CC1=CC(O)=C(O)C=C1</chem>                                                                                    |
| 15 | rebouoside B                                                        | <chem>OC1=C(O)C=CC(CCO[C@H]2[C@H](O)[C@@H](O)[C@H](O)[C@@H](CO[C@H]3[C@H](O)[C@@H](O)[C@H](O)CO3)O2)=C1</chem>               |
| 16 | 5-O-caffeoylquinic acid                                             | <chem>O[C@@H]1[C@H](OC/C=C/C2=CC(O)=C(O)C=C2)O)C[C@@](O)(C(O)=O)C[C@H]1O</chem>                                              |
| 17 | 4-feruloylquinic acid-4'-O-β-D-glucopyranoside                      | <chem>O[C@]1(C(O)=O)C[C@@H](O)[C@H](OC/C=C/C2=CC(OC)=C(O[C@@H]3[C@@H](O)[C@H](O)[C@@H](CO)O3)C=C2)O)[C@H](O)C1</chem>        |
| 18 | 3-(4'-hydroxyphenyl)-(2R)-lactic acid                               | <chem>OC(C(O)=O)CC1=CC=C(O)C=C1</chem>                                                                                       |
| 19 | methyl-3-(4'-O-β-D-glucopyranosyl-3',4'-dihydroxyphenyl)-lactate    | <chem>OC(C(O)=O)CC1=CC(OC)=C(O[C@H]2[C@H](O)[C@@H](O)[C@H](O)[C@@H](CO)O2)C=C1</chem>                                        |

|    |                                                                           |                                                                                                                                                           |
|----|---------------------------------------------------------------------------|-----------------------------------------------------------------------------------------------------------------------------------------------------------|
| 20 | darendoside A                                                             | <chem>OC1=CC=C(CCO[C@H]2[C@H](O)[C@@H](O)[C@H](O)[C@@H](CO[C@H]3[C@H](O)[C@@H](O)[C@H](O)CO3)O2)C=C1</chem>                                               |
| 21 | chlorogenic acid                                                          | <chem>O[C@@H]1[C@H](O)C[C@@](O)(C(O)=O)C[C@H]1OC(/C=C/C2=CC(O)=C(O)C=C2)=O</chem>                                                                         |
| 22 | 4-O-caffeoylquinic acid                                                   | <chem>O[C@]1(C(O)=O)C[C@@H](O)[C@H](OC(/C=C/C2=CC(O)=C(O)C=C2)=O)[C@H](O)C1</chem>                                                                        |
| 23 | 7S, 8R, 8'R-(+)-lariciresinol-4,4'-O-β-D-diglucofuranoside                | <chem>OC[C@H]([C@@H](C1=CC(OC)=C(O)[C@H]2[C@H](O)C(O)[C@H](O)[C@@H](CO)O2)C=C1)OC3[C@H]3CC4=CC=C(O[C@H]5[C@H](O)C(O)[C@H](O)[C@@H](CO)O5)C(OC)=C4</chem>  |
| 24 | 5-O-feruloylquinic acid                                                   | <chem>O[C@@H]1[C@H](OC(/C=C/C2=CC(OC)=C(O)C=C2)=O)C[C@@](O)(C(O)=O)C[C@H]1O</chem>                                                                        |
| 26 | (+)-pinoresinol-4,4'-O-β-D-diglucofuranoside                              | <chem>O[C@@H]1[C@@H](O)[C@H](O)[C@@H](CO)O[C@H]1OC2=CC=C([C@H]3OCC4C3CO[C@@H]4C5=CC(OC)=C(O)[C@H]6[C@H](O)[C@@H](O)[C@H](O)[C@@H](CO)O6)C=C5)C=C2O</chem> |
| 27 | magnoflorine                                                              | <chem>OC1=C(OC)C=C2C3=C1C(C(O)=C(OC)C=C4)=C4CC3[N+](C)(C)CC2</chem>                                                                                       |
| 28 | 4-O-feruloylquinic acid                                                   | <chem>O[C@]1(C(O)=O)C[C@@H](O)[C@H](OC(/C=C/C2=CC(OC)=C(O)C=C2)=O)[C@H](O)C1</chem>                                                                       |
| 29 | 2,3-bis-[(4-hydroxy-3,5-dimethoxyphenyl)-methyl]-1,4-butanediol glycoside | <chem>OC(C(OC)=C1)=CC=C1CC(CO)C(CO)CC2=CC(OC)=C(O[C@H]3[C@H](O)[C@@H](O)[C@H](O)[C@@H](CO)O3)C=C2</chem>                                                  |
| 30 | (+)-lariciresinol glucoside                                               | <chem>OC[C@H]([C@@H](C1=CC(OC)=C(O)C=C1)OC2)[C@H]2CC3=CC=C(O[C@H]4[C@H](O)C(O)[C@H](O)[C@@H](CO)O4)C(OC)=C3</chem>                                        |
| 31 | methyl 5-O-feruloylquinic acid                                            | <chem>O[C@@H]1[C@H](OC(/C=C/C2=CC(OC)=C(O)C=C2)=O)C[C@@](O)(C(OC)=O)C[C@H]1O</chem>                                                                       |
| 33 | isolarisiresinol-9-O-β-D-glucopyranoside                                  | <chem>OC[C@H]1[C@H](CO[C@H]2[C@H](O)[C@@H](O)[C@H](O)[C@@H](CO)O2)[C@@H](C3=CC=C(O)C(OC)=C3)C4=CC(O)=C(OC)C=C4C1</chem>                                   |
| 34 | methyl 3-O-feruloylquinic acid                                            | <chem>O[C@@H]1[C@H](O)C[C@@](O)(C(OC)=O)C[C@H]1OC(/C=C/C2=CC(OC)=C(O)C=C2)=O</chem>                                                                       |
| 35 | menisperine                                                               | <chem>OC1=C(OC)C=CC(C2)=C1C3=C(C2[N+](C)(C)CC4)C4=CC(OC)=C3OC</chem>                                                                                      |
| 36 | woorenoside XI                                                            | <chem>OC[C@H]1[C@H](CO)[C@@H](C2=CC=C(O)C(OC)=C2)C3=CC(O[C@H]4[C@H](O)[C@@H](O)[C@H](O)[C@@H](CO)O4)=C(OC)C=C3C1</chem>                                   |
| 37 | (+)-pinoresinol glucoside                                                 | <chem>OC1=CC=C([C@H]2OCC3C2CO[C@@H]3C4=CC(OC)=C(O[C@H]5[C@H](O)[C@@H](O)[C@H](O)[C@@H](CO)O5)C=C4)C=C1OC</chem>                                           |
| 38 | berberrubine                                                              | <chem>OC1=C(OC)C=CC2=C1C=[N+]3C(C4=CC5=C(OCO5)C=C4CC3)=C2</chem>                                                                                          |



Supplementary materials

|       |                                  |                                                                                      |
|-------|----------------------------------|--------------------------------------------------------------------------------------|
| 39    | methyl 4-O-feruloylquicinate     | <chem>O[C@]1(C(OC)=O)C[C@@H](O)[C@H](OC(/C=C/C2=CC(OC)=C(O)C=C2)=O)[C@H](O)C1</chem> |
| 40    | 8-oxyberberine                   | <chem>O=C1C2=C(C=CC(OC)=C2OC)C=C3C4=CC5=C(OCO5)C=C4CCN31</chem>                      |
| 42    | columbamine                      | <chem>OC1=C(OC)C=C2C(C3=CC(C=CC(OC)=C4OC)=C4C=[N+]3CC2)=C1</chem>                    |
| 43    | epiberberine                     | <chem>COC1=C(OC)C=C(C2=CC(C=CC3=C4OCO3)=C4C=[N+]2CC5)C5=C1</chem>                    |
| 44    | jatrorrhizine                    | <chem>OC1=C(OC)C=C(C2=CC(C=CC(OC)=C3OC)=C3C=[N+]2CC4)C4=C1</chem>                    |
| 45    | coptisine                        | <chem>C1(OCO2)=C2C=C(C3=CC(C=CC4=C5OCO4)=C5C=[N+]3CC6)C6=C1</chem>                   |
| 46    | groenlandicine                   | <chem>OC1=C(OC)C=C(C2=CC(C=CC3=C4OCO3)=C4C=[N+]2CC5)C5=C1</chem>                     |
| 47/52 | 13-methyl berberine              | <chem>CC1=C2C3=CC4=C(OCO4)C=C3CC[N+]2=CC5=C1C=CC(OC)=C5OC</chem>                     |
| 48/49 | worenine or its isomers          | <chem>CC1=C2C3=CC4=C(OCO4)C=C3CC[N+]2=CC5=C1C=CC6=C5OCO6</chem>                      |
| 50    | palmatine                        | <chem>COC1=C(OC)C=C(C2=CC(C=CC(OC)=C3OC)=C3C=[N+]2CC4)C4=C1</chem>                   |
| 51    | berberine                        | <chem>COC1=C(OC)C=CC2=C1C=[N+]3C(C4=CC5=C(OCO5)C=C4CC3)=C2</chem>                    |
| 53    | 7,4'-dihydroxy-5-methoxyfavanone | <chem>OC1=CC(OC)=C(C(CC(C2=CC=C(O)C=C2)O3)=O)C3=C1</chem>                            |
| 55    | wogonin                          | <chem>OC1=CC(O)=C(C(C=C(C2=CC=CC=C2)O3)=O)C3=C1OC</chem>                             |
